# Supplementary material
Source: publisher site journal article supplement (https://www.dovepress.com/article/supplementary_file/611133/611133%20Supplementary%201.docx)
Supplement: Supplementary file 1 [file 611133%20Supplementary%201.docx]

### Healthcare Worker’s In-depth Interview Guide

My name is (mention your name), and I am here to ask about your sentiments and experiences managing HIV patients with hypertension (HTN) or Diabetes Mellitus (DM). Thank you for taking the time to share your experiences with us. Your insights are crucial for understanding the gaps in care and helping us devise strategies.

This session will be recorded, but no identifying information like your name will be asked for. It will only be listened to by the research team for this research and later stored in a secure device with restricted access. We ask that you be as open as possible; however, you have a right not to answer certain questions and are free to terminate the interview at any stage.

**NB**: Ascertain and note the health worker’s demographics: Age, Sex, Cadre

**General Information**

- **Q1:** Can you tell me about your role at the clinic, especially regarding the care of patients with HIV?
- **Q2:** How long have you worked as a health worker in HIV, particularly in this department or clinic?

**Current Management of HIV, Hypertension, and Diabetes**

- **Q3:** How is the care for patients with hypertension and diabetes integrated with HIV care in this hospital?
- **Q4:** Tell me about any protocols or guidelines that are currently followed for managing hypertension and diabetes in HIV patients.
- **Q5:** What challenges do you face in managing patients with comorbid HIV, hypertension, and diabetes?
- **Q6:** How do you think these challenges could be addressed?
- **Q7:** Do you feel you are comfortable managing hypertension or diabetes among these patients
- **Q8:** Are you equipped with the tools to manage HTN/DM effectively in this clinic?
- **Q9:** Tell me more about your motivation to effectively management of People living with HIV with HTN/DM?
